# Supplementary material for: Examination of reliability and validity of the Self-Assessment Burden Scale-Motor for community-dwelling older adults in Japan: a validation study
Source: PeerJ. 2024 Jul 18;12:e17730. doi: 10.7717/peerj.17730 (PMC11260414; doi:10.7717/peerj.17730)
Supplement: Supplemental Information 2 [file peerj-12-17730-s002.docx]

STROBE Statement—checklist of items that should be included in reports of observational studies

|  | | Item No. | Recommendation | | | Page No. | **Section** | **Subheadings** | Line numbers |
| --- | --- | --- | --- | --- | --- | --- | --- | --- | --- |
| Title and abstract | | 1 | (*a*) Indicate the study’s design with a commonly used term in the title or the abstract | | | P1  P1-P2 | Title  Abstract |  | L1-L3  L24-L54 |
| (*b*) Provide in the abstract an informative and balanced summary of what was done and what was found | | | P1-P2 | Abstract |  | L24-L54 |
|  |  | | |  | Introduction | | | | |
| Background/rationale | | 2 | Explain the scientific background and rationale for the investigation being reported | | | P2-P3 | Introduction |  | L58-L104 |
| Objectives | | 3 | State specific objectives, including any prespecified hypotheses | | | P3 | Introduction |  | L103-L104 |
|  |  | | |  | Methods | | | | |
| Study design | | 4 | Present key elements of study design early in the paper | | | P3 | Materials & Methods | Study design | L109-L111 |
| Setting | | 5 | Describe the setting, locations, and relevant dates, including periods of recruitment, exposure, follow-up, and data collection | | | P3 | Materials & Methods | Setting | L114-L116 |
| Participants | | 6 | (*a*) *Cohort study*—Give the eligibility criteria, and the sources and methods of selection of participants. Describe methods of follow-up  *Case-control study*—Give the eligibility criteria, and the sources and methods of case ascertainment and control selection. Give the rationale for the choice of cases and controls  *Cross-sectional study*—Give the eligibility criteria, and the sources and methods of selection of participants | | | P4 | Materials & Methods | Participants | L119-L123 |
| (*b*)*Cohort study*—For matched studies, give matching criteria and number of exposed and unexposed  *Case-control study*—For matched studies, give matching criteria and the number of controls per case | | | none | | | |
| Variables | | 7 | Clearly define all outcomes, exposures, predictors, potential confounders, and effect modifiers. Give diagnostic criteria, if applicable | | | P4 | Materials & Methods | Variables | L128-L131 |
| Data sources/ measurement | | 8* | For each variable of interest, give sources of data and details of methods of assessment (measurement). Describe comparability of assessment methods if there is more than one group | | | P5 | Materials & Methods | Procedure and Data Analysis | L177-L178  L188  L192-L193 |
| Bias | | 9 | Describe any efforts to address potential sources of bias | | | P5 | Materials & Methods | Procedure and Data Analysis | L178-L180  L193 |
| Study size | | 10 | Explain how the study size was arrived at | | | P4 | Materials & Methods | Participants | L124-L125 |

Continued on next page

| Quantitative variables | | 11 | Explain how quantitative variables were handled in the analyses. If applicable, describe which groupings were chosen and why | | | P5 | Materials & Methods | Procedure and Data Analysis | L180-L182  L188-L189  L194-L195 |
| --- | --- | --- | --- | --- | --- | --- | --- | --- | --- |
| Statistical methods | | 12 | (*a*) Describe all statistical methods, including those used to control for confounding | | | none | | | |
| (*b*) Describe any methods used to examine subgroups and interactions | | | none | | | |
| (*c*) Explain how missing data were addressed | | | P6 | Materials & Methods | Criterion validity | L199-L200 |
| (*d*) *Cohort study*—If applicable, explain how loss to follow-up was addressed  *Case-control study*—If applicable, explain how matching of cases and controls was addressed  *Cross-sectional study*—If applicable, describe analytical methods taking account of sampling strategy | | | none | | | |
| (*e*) Describe any sensitivity analyses | | | none | | | |
|  |  | | |  | **Results** | | | | |
| Participants | | 13* | (a) Report numbers of individuals at each stage of study—eg numbers potentially eligible, examined for eligibility, confirmed eligible, included in the study, completing follow-up, and analysed | | | P6 | Results | Participants | L211-L215 |
| (b) Give reasons for non-participation at each stage | | | none | | | |
| (c) Consider use of a flow diagram | | | none | | | |
| Descriptive data | | 14* | (a) Give characteristics of study participants (eg demographic, clinical, social) and information on exposures and potential confounders | | | P6 | Results | Test-retest reliability  Internal Consistency  Criterion validity | L218-L220  L228-L230  L235-L236 |
| (b) Indicate number of participants with missing data for each variable of interest | | | P6 | Results | Participants | L212-L213 |
| (c) *Cohort study*—Summarise follow-up time (eg, average and total amount) | | | none | | | |
| Outcome data | | 15* | *Cohort study*—Report numbers of outcome events or summary measures over time | | | none | | | |
| *Case-control study—*Report numbers in each exposure category, or summary measures of exposure | | | none | | | |
| *Cross-sectional study—*Report numbers of outcome events or summary measures | | | Table 1 and 3 | | | |
| Main results | | 16 | (*a*) Give unadjusted estimates and, if applicable, confounder-adjusted estimates and their precision (eg, 95% confidence interval). Make clear which confounders were adjusted for and why they were included | | | P6 | Results | Test-retest reliability  Internal Consistency  Criterion validity | L221-L224  L231-L232  L237-L238 |
| (*b*) Report category boundaries when continuous variables were categorized | | | none | | | |
| (*c*) If relevant, consider translating estimates of relative risk into absolute risk for a meaningful time period | | | none | | | |

Continued on next page

| Other analyses | | 17 | Report other analyses done—eg analyses of subgroups and interactions, and sensitivity analyses | | | none | | | |
| --- | --- | --- | --- | --- | --- | --- | --- | --- | --- |
|  |  | | |  | **Discussion** | | | | |
| Key results | | 18 | Summarise key results with reference to study objectives | | | P7 | Discussion |  | L242-L248 |
| Limitations | | 19 | Discuss limitations of the study, taking into account sources of potential bias or imprecision. Discuss both direction and magnitude of any potential bias | | | P8 | Discussion  Conclusions |  | L292-L303  L312-L317 |
| Interpretation | | 20 | Give a cautious overall interpretation of results considering objectives, limitations, multiplicity of analyses, results from similar studies, and other relevant evidence | | | P7 | Discussion |  | L249-L272 |
| Generalisability | | 21 | Discuss the generalisability (external validity) of the study results | | | P8 | Discussion  Conclusions |  | L300-L303  L315-L317 |
|  |  | | |  | **Other information** | | | | |
| Funding | | 22 | Give the source of funding and the role of the funders for the present study and, if applicable, for the original study on which the present article is based | | | none | | | |

*Give information separately for cases and controls in case-control studies and, if applicable, for exposed and unexposed groups in cohort and cross-sectional studies.

**Note:** An Explanation and Elaboration article discusses each checklist item and gives methodological background and published examples of transparent reporting. The STROBE checklist is best used in conjunction with this article (freely available on the Web sites of PLoS Medicine at http://www.plosmedicine.org/, Annals of Internal Medicine at http://www.annals.org/, and Epidemiology at http://www.epidem.com/). Information on the STROBE Initiative is available at www.strobe-statement.org.
